# Supplementary material
Source: publisher site journal article supplement (https://www.degruyterbrill.com/publication/isbn/9783110238853/downloadAsset/9783110238853_Inhaltsverzeichnis.pdf)
Supplement: Supplementary file 1 [file 9783110238853_Inhaltsverzeichnis.pdf]

# Inhaltsverzeichnis

## 1. BAND

|                                                                                                   |      |
|---------------------------------------------------------------------------------------------------|------|
| Vorwort . . . . .                                                                                 | V    |
| Abkürzungsverzeichnis . . . . .                                                                   | XIII |
| I Einleitung . . . . .                                                                            | 1    |
| II Forschungsbericht . . . . .                                                                    | 13   |
| III Die ergänzten Berliner Antiken des 18. Jahrhunderts . . . . .                                 | 19   |
| III.1 Erwerbungen und deren Aufstellungsorte in den Schlössern<br>in Potsdam und Berlin . . . . . | 19   |
| Die Erwerbung der Sammlung Polignac aus Paris . . . . .                                           | 20   |
| Die Schenkung der Sammlung Bayreuth . . . . .                                                     | 26   |
| Die Ankäufe von Bianconi in Rom . . . . .                                                         | 29   |
| Die Ankäufe von Erdmannsdorff in Rom . . . . .                                                    | 32   |
| III.2 Restaurierung der Berliner Skulpturen durch Bildhauer<br>in Rom . . . . .                   | 36   |
| Lambert-Sigisbert Adam und Edmé Bouchardon . . . . .                                              | 37   |
| Bartolomeo Cavaceppi . . . . .                                                                    | 45   |
| Carlo Albacini . . . . .                                                                          | 53   |
| III.3 Die Berliner antike Plastik als Beutekunst in Paris . . . . .                               | 57   |
| Die Präsentation im Louvre . . . . .                                                              | 59   |
| Unterlassene Restaurierungen . . . . .                                                            | 61   |
| IV Die Umrestaurierung der Berliner Antiken in den 1820er Jahren . . . . .                        | 65   |
| IV.1 Antikenrestaurierung zur Präsentation im Königlichen<br>Museum in Berlin . . . . .           | 65   |
| Überprüfung des Altbestandes durch Aloys Hirt und<br>Christian Daniel Rauch . . . . .             | 65   |
| Präsentation der antiken Skulpturen im Königlichen Museum . . . . .                               | 70   |

|                                                                       |     |
|-----------------------------------------------------------------------|-----|
| Restaurierungsgrundsätze für die antike Plastik . . . . .             | 81  |
| Neubewertung und Umrestaurierung der »Lykomedes-Familie« . .          | 94  |
| Ergänzungen, Torsi und Fragmente . . . . .                            | 103 |
| Schloss Tegel als Laboratorium für Antikenrestaurierung . . . .       | 110 |
| Neuerwerbungen in Rom . . . . .                                       | 113 |
| Gescheiterte Ankäufe griechischer Plastik . . . . .                   | 120 |
| IV.2 Die Berliner Bildhauerwerkstatt . . . . .                        | 123 |
| Christian Daniel Rauch . . . . .                                      | 123 |
| Johann Gottfried Schadow . . . . .                                    | 129 |
| Die Organisation der Restaurierungskampagne . . . . .                 | 130 |
| Die deutschen und italienischen Mitarbeiter der Rauch-Werkstatt       | 137 |
| Rauchs antiquarisches Wissen und seine Denkmälerkenntnisse . .        | 148 |
| Gips als reversibles Ergänzungsmaterial . . . . .                     | 154 |
| Christian Friedrich Tieck . . . . .                                   | 155 |
| Veränderungen in der Restaurierungsauffassung . . . . .               | 167 |
| IV.3 Restaurierung der Berliner Antiken durch Bildhauer in Rom        | 169 |
| Emil Wolff . . . . .                                                  | 169 |
| Pietro Tenerani . . . . .                                             | 179 |
| V Restaurierungsvielfalt im 2. Drittel des 19. Jahrhunderts . . . . . | 183 |
| V.1 Neuerwerbungen von Berliner Skulpturen auf dem Kunst-             |     |
| markt in Italien . . . . .                                            | 183 |
| Die Notwendigkeit zur Vergrößerung der Sammlung . . . . .             | 184 |
| Die sukzessive Erweiterung der Ausstellungsflächen . . . . .          | 187 |
| Kriterien für die Neuankäufe . . . . .                                | 191 |
| V.2 Die Direktoren der Berliner Sammlung antiker Skulpturen .         | 195 |
| Der Bildhauer Christian Friedrich Tieck . . . . .                     | 195 |
| Der »Archäolog« Eduard Gerhard . . . . .                              | 202 |
| Der Architekt Carl Boetticher . . . . .                               | 212 |
| Der Klassische Archäologe Alexander Conze . . . . .                   | 219 |
| V.3 Antikenrestaurierung und Konzepte der Bildhauer in                |     |
| Berlin und Rom . . . . .                                              | 223 |
| Emil Wolff und die Restaurierung der Skulpturen mit Marmor . .        | 223 |
| Antikenergänzungen des Rauch-Schülers Julius Troschel . . . .         | 226 |
| Friedrich Tieck und die Ergänzung der Plastik mit Gips . . . .        | 227 |
| Voll- und Teilergänzungen unter Carl Boetticher und                   |     |
| Alexander Conze . . . . .                                             | 232 |
| Beibehaltung des fragmentarischen Zustandes . . . . .                 | 235 |

|       |                                                                                        |     |
|-------|----------------------------------------------------------------------------------------|-----|
| VI    | Fragmente und Entrestaurierungen seit den 1880er Jahren . . . . .                      | 241 |
| VI.1  | Neuzugänge durch die Berliner Großgrabungen . . . . .                                  | 241 |
|       | Die Ausgrabungen in Pergamon . . . . .                                                 | 242 |
|       | Die Restaurierung der pergamenischen Plastik . . . . .                                 | 247 |
|       | Die Teilergänzung ausgewählter pergamenischer Skulpturen . . .                         | 252 |
|       | Die Ausgrabungen in Olympia . . . . .                                                  | 254 |
|       | Die Rekonstruktion der Nike und des Hermes . . . . .                                   | 258 |
|       | Die Vervollständigung der Dionysos-Satyr-Gruppe aus Milet . . .                        | 260 |
| VI.2  | Neuerwerbungen von Berliner Skulpturen auf dem<br>internationalen Kunstmarkt . . . . . | 266 |
|       | Der Ankauf griechischer Originale . . . . .                                            | 266 |
| VI.3  | Die Überprüfung des Berliner Altbestandes<br>an antiker Plastik . . . . .              | 270 |
|       | Abgaben an andere Abteilungen der Berliner Museen . . . . .                            | 272 |
|       | Die Magazinierung ergänzter römischer Idealplastik . . . . .                           | 276 |
|       | Die Entrestaurierung ausgewählter antiker Skulpturen . . . . .                         | 280 |
| VI.4  | Antikenrestauratoren und Naturwissenschaftler in Berlin . .                            | 297 |
|       | Die italienischen Bildhauer Antonio Freres und Temistocle Possenti                     | 298 |
|       | Das Berliner »Chemische Laboratorium« . . . . .                                        | 300 |
| VI.5  | Skulpturenergänzung im Rahmen der Kaiserlichen<br>Preisaufgaben . . . . .              | 307 |
|       | Der »Schöne Kopf« von Pergamon . . . . .                                               | 307 |
|       | Die »Berliner Tänzerin« . . . . .                                                      | 312 |
| VII   | Restaurierung der Berliner antiken Plastik im 19. Jahrhundert . . .                    | 315 |
| VII.1 | Material und Technik . . . . .                                                         | 315 |
|       | Die Reinigung von antiken Skulpturen . . . . .                                         | 316 |
|       | Die Bearbeitung und Ausführung der Fugen . . . . .                                     | 319 |
|       | Die Ausführung der Dübellöcher und das Material der Dübel . . .                        | 322 |
|       | Das traditionelle Ergänzungsmaterial Marmor . . . . .                                  | 326 |
|       | Reversible Ergänzungen aus Gips . . . . .                                              | 329 |
|       | Die traditionellen Klebemittel Blei, Gips und Kolophonium . . .                        | 331 |
|       | Schwefel und Sorel-Zement als neue Klebematerialien . . . . .                          | 333 |
|       | Schleifen und Polieren der Ergänzungsoberflächen . . . . .                             | 335 |
|       | Künstliche Alterung und Verwitterung von Ergänzungen . . . . .                         | 336 |
|       | Die Präsentation mit Hilfe von drehbaren Aufstellungen . . . . .                       | 339 |

|        |                                                                                                      |     |
|--------|------------------------------------------------------------------------------------------------------|-----|
| VII.2  | Dokumentation der Ergänzungen . . . . .                                                              | 342 |
|        | Die Beschreibung der Skulpturensammlung durch<br>Matthias Oesterreich . . . . .                      | 344 |
|        | Die Bekanntmachung der preußischen Antiken durch<br>Konrad Levezow . . . . .                         | 350 |
|        | Die kurzen Museumsführer von Friedrich Tieck . . . . .                                               | 352 |
|        | Der erste wissenschaftliche Skulpturenkatalog von Eduard Gerhard . . . . .                           | 353 |
|        | Der grundlegende Skulpturenkatalog unter Alexander Conze . . . . .                                   | 355 |
| VII.3  | Restaurierung und Ausstellung . . . . .                                                              | 360 |
|        | Die Erstaufstellung der antiken Skulpturen im Königlichen<br>Museum von 1830/31 . . . . .            | 361 |
|        | Restaurierung und Aufstellung im zweiten Drittel des 19. Jahrhunderts . . . . .                      | 374 |
|        | Der Eingriff in die bestehende Ausstellung durch die Skulpturen<br>aus der Pergamongrabung . . . . . | 380 |
|        | Die Skulpturenfragmente im ersten Pergamonmuseum . . . . .                                           | 386 |
|        | Die programmatische Neuaufstellung der Plastik 1906/07 im<br>Alten Museum . . . . .                  | 388 |
| VII.4  | Berliner Antikenrestaurierung im Vergleich . . . . .                                                 | 400 |
|        | Gemälderrestaurierung . . . . .                                                                      | 400 |
|        | Restaurierung antiker Keramik . . . . .                                                              | 407 |
|        | Metallrestaurierung . . . . .                                                                        | 411 |
|        | Restaurierung und Rekonstruktion antiker Architektur . . . . .                                       | 415 |
| VII.5  | Restaurierung antiker Skulpturen in anderen<br>europäischen Museen . . . . .                         | 424 |
|        | Die Berliner Restaurierungen der 1820er Jahre im Vergleich mit<br>anderen Museen . . . . .           | 424 |
|        | Der Vatikan und die Kapitolinischen Museen in Rom . . . . .                                          | 429 |
|        | Die Glyptothek in München . . . . .                                                                  | 435 |
|        | Der Louvre in Paris . . . . .                                                                        | 440 |
|        | Die Dresdner Skulpturensammlung . . . . .                                                            | 445 |
|        | Das British Museum in London . . . . .                                                               | 448 |
|        | Die St. Petersburger Eremitage . . . . .                                                             | 453 |
|        | Die Ny Carlsberg Glyptotek in Kopenhagen . . . . .                                                   | 456 |
|        | Die Berliner Entrestaurierungen im Vergleich mit anderen Museen . . . . .                            | 457 |
| VIII   | Zusammenfassung / Summary . . . . .                                                                  | 465 |
| VIII.1 | Zusammenfassung . . . . .                                                                            | 465 |
| VIII.2 | Summary . . . . .                                                                                    | 474 |

|                                                            |     |
|------------------------------------------------------------|-----|
| IX Anhang . . . . .                                        | 483 |
| IX.1 Verzeichnisse . . . . .                               | 483 |
| Personen . . . . .                                         | 483 |
| Bildhauer – restaurierte Objekte . . . . .                 | 511 |
| IX.2 Konkordanz der Museumsräume . . . . .                 | 513 |
| IX.3 Literaturverzeichnis . . . . .                        | 516 |
| IX.4 Verzeichnis nicht gedruckter Quellen . . . . .        | 571 |
| IX.5 Tafelnachweise . . . . .                              | 578 |
| IX.6 Abbildungsnachweise . . . . .                         | 594 |
| IX.7 Konkordanz der Inventar- und Katalognummern . . . . . | 597 |
| IX.8 Personen-, Orts- und Sachregister . . . . .           | 599 |

## 2. Band

|                                                                    |     |
|--------------------------------------------------------------------|-----|
| X Katalog . . . . .                                                | 1   |
| Vorbemerkungen . . . . .                                           | 1   |
| X.1 Der Altbestand aus dem 18. Jahrhundert . . . . .               | 4   |
| X.2 Die Erwerbungen in den 1820er Jahren . . . . .                 | 243 |
| X.3 Die Erwerbungen von 1832 bis 1877 . . . . .                    | 320 |
| X.4 Die Erwerbungen auf dem Kunstmarkt von 1878 bis 1918 . . . . . | 389 |
| X.5 Liste der nicht im Katalog enthaltenen Skulpturen . . . . .    | 406 |

## 3. Band

|                                          |            |
|------------------------------------------|------------|
| A Tafeln . . . . .                       | Taf. 1–139 |
| B Technische Detailabbildungen . . . . . | Tech. 1–93 |
| C Dübelkartierungen . . . . .            | Düb. 1–36  |
